# Supplementary material for: Overexpression of MYC and BCL2 Predicts Poor Prognosis in Patients with Extranodal NK/T-cell Lymphoma, Nasal Type
Source: PubMed Central journal article supplement — J Cancer. 2017 Feb 25;8(5):793–800. doi: 10.7150/jca.17766 (PMC5381167; doi:10.7150/jca.17766), 2017-02-25

**Supplemental Figure 1.** LMP-1 mediated the overexpression of c-myc and bcl-2 in NK cell line (NK-92). The protein expression level of c-myc and bcl-2 in LMP-1 transfected NK-92 cell line were much higher than control (NK-92 cell line) or NC group (control vector transfected NK-92 cell line).

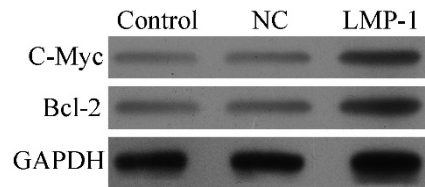

Supplement: jcav08p0793s1.pdf [file jcav08p0793s1.pdf]
